# Supplementary material for: Clonal gene signatures predict prognosis in mesothelioma and lung adenocarcinoma
Source: PubMed Central journal article supplement (PMC10891127; doi:10.1038/s41698-024-00531-y), 2024-02-23
Supplement: 41698_2024_531_MOESM1_ESM.pdf [file 41698_2024_531_MOESM1_ESM.pdf]

|    |                                                                                                |
|----|------------------------------------------------------------------------------------------------|
| 1  | <b>Supplementary information</b>                                                               |
| 2  |                                                                                                |
| 3  | Supplementary Table 1 PRACME clonal gene signature                                             |
| 4  | Supplementary Table 2 Univariable Cox Regression of PRACME and ORACLE in MPM data              |
| 5  | Supplementary Table 3 Multivariable Cox Regression of PRACME and ORACLE in MPM data            |
| 6  | Supplementary Table 4 Bueno MPM stratification analysis                                        |
| 7  | Supplementary Table 5 Correlation between PRACME and Throsson-immunity table                   |
| 8  | Supplementary Table 6 Correlation between PRACME and GSVA scores                               |
| 9  | Supplementary Table 7 Summary of Cox Regression of PRACME on all clinical variables            |
| 10 | Supplementary Table 8 Mutation status in MPM data                                              |
| 11 |                                                                                                |
| 12 | Supplementary Figure 1 Association of PRACME signature score with additional clinical          |
| 13 | features                                                                                       |
| 14 | Supplementary Figure 2 PRACME signature is not predictive of prognosis in lung squamous        |
| 15 | carcinoma                                                                                      |
| 16 | Supplementary Figure 3 PRACME signature is negatively correlated to immune infiltration levels |
| 17 | Supplementary Figure 4 PRACME score between histology in multiregional data                    |

| Gene Name | Coefficient | Location in genome |
|-----------|-------------|--------------------|
| ACAT2     | 0.03        | 6q25.3             |
| ADAM9     | 0.04        | 8p11.22            |
| ADAMTS1   | 0.03        | 21q21.3            |
| AGPAT5    | 0.09        | 8p23.1             |
| B3GALNT2  | 0.23        | 1q42.3             |
| COL11A1   | 0.02        | 1p21.1             |
| CPT2      | -0.52       | 1p32.3             |
| DSC3      | 0.02        | 18q12.1            |
| FAT1      | 0.12        | 4q35.2             |
| FTSJD1    | -0.01       | 16q22.2            |
| KIAA1199  | -0.02       | 15q25.1            |
| MAP4K4    | 0.21        | 2q11.2             |
| MCTP2     | -0.27       | 15q26.2            |
| METTL1    | 0.07        | 12q14.1            |
| MR1       | -0.27       | 1q25.3             |
| NRIP1     | 0.2         | 21q11.2-q21.1      |
| PANK4     | -0.11       | 1p36.32            |
| PLXND1    | -0.02       | 3q22.1             |
| PWP1      | 0.05        | 12q23.3            |
| RAP1GDS1  | 0.65        | 4q23               |
| RUVBL2    | 0.27        | 19q13.33           |
| SH3TC1    | 0.5         | 4p16.1             |
| SNX5      | 0.57        | 20p11.23           |
| SPAG5     | 0.34        | 17q11.2            |
| SPRY2     | -0.24       | 13q31.1            |
| SYS1      | -0.11       | 20q13.12           |
| TMEM183A  | 0.24        | 1q32.1             |
| TSPAN3    | 0.15        | 15q24.3            |
| UVRAG     | -0.57       | 11q13.5            |

20 Supplementary Table 2 Univariable Cox Regression

|        | Univariable Cox Regression |                |                |
|--------|----------------------------|----------------|----------------|
|        | TCGA-MESO                  | Bueno          | Bott_GSE29354  |
| PRACME | 1.12(2.6e-16)              | 1.40 (4.6e-04) | 1.61 (1.3e-02) |
| ORACLE | 1.04 (1.0e-08)             | 1.63 (1.6e-09) | 1.51 (6.2e-03) |

28  
29 Supplementary Table 3 Multivariable Cox Regression

|        | Multivariable Cox Regression |                 |               |
|--------|------------------------------|-----------------|---------------|
|        | TCGA-MESO                    | Bueno           | Bott_GSE29354 |
| PRACME | 1.13(5.3e-13)                | 1.37 (4.60e-04) | 1.61(1.3e-02) |
| ORACLE | 1.04(4.0e-07)                | 1.61 (4.46e-06) | 2.08(4.1e-03) |

38 Supplementary Table 4 Bueno MPM stratification

| <b>Validation Histology</b>     | <b>HR</b> | <b>p-value</b> |
|---------------------------------|-----------|----------------|
| Biphasic (n = 62)               | 1.03      | 0.88           |
| Epithelioid (n = 141)           | 1.61      | 7.21e-07       |
| All patients (n = 211)          | 1.43      | 2.63e-06       |
| <b>Patient Stages</b>           | <b>HR</b> | <b>p-value</b> |
| Early (stage I and II) (n=58)   | 1.49      | 0.02           |
| Late (stage III and IV) (n=125) | 1.45      | 4.04e-05       |
| <b>Smoking History</b>          | <b>HR</b> | <b>p-value</b> |
| Smoking history (n = 114)       | 1.48      | 3.64e-04       |
| No smoking history (n = 96)     | 1.41      | 1.14e-09       |

50  
51 Supplementary Table 5 Correlation between PRACME score and Throsson-immunity table

|                          |      |
|--------------------------|------|
| Intratumor Heterogeneity | 0.40 |
| Proliferation            | 0.77 |
| TGF beta Response        | 0.47 |

58 Supplementary Table 6. Correlation with GSVA pathways

| Pathways                                       | PRACME |
|------------------------------------------------|--------|
| REACTOME_PHASE1_FUNCTIONALIZATION_OF_COMPOUNDS | 0.67   |
| REACTOME_NUCLEAR_SIGNALING_BY_ERBB4            | 0.59   |
| KEGG_LINOLEIC_ACID_METABOLISM                  | 0.55   |
| REACTOME_BIOLOGICAL_OXIDATIONS                 | 0.58   |
| REACTOME_COMPLEMENT_CASCADE                    | 0.52   |

|                                                     |      |    |
|-----------------------------------------------------|------|----|
| KEGG_DRUG_METABOLISM_CYTOCHROME_P450                | 0.52 | 59 |
| REACTOME_BILE_ACID_AND_BILE_SALT_METABOLISM         | 0.48 | 61 |
| KEGG_TYROSINE_METABOLISM                            | 0.48 | 62 |
| REACTOME_CYTOCHROME_P450_ARRANGED_BY_SUBSTRATE_TYPE | 0.52 | 64 |
|                                                     |      | 65 |
|                                                     |      | 66 |

67  
68 Supplementary Table 7 Summary of Cox Regression of PRACME on all clinical variables

69  
70 Bueno Univariable analysis with PRACME

|                   |             | HR        | p-value   | 71 |
|-------------------|-------------|-----------|-----------|----|
| Age               | Age         | 1.0       | 0.008     | 72 |
| Stage             | Stage I     | reference | reference | 74 |
|                   | Stage II    | 1.8       | 0.2       | 75 |
|                   | Stage III   | 2.1       | 0.1       | 76 |
|                   | Stage IV    | 2.5       | 0.06      | 77 |
| Sex               | Female      | reference | reference | 78 |
|                   | Male        | 1.3       | 0.2       | 79 |
| Histology         | Epithelioid | reference | reference | 80 |
|                   | Biphasic    | 1.5       | 0.01      | 81 |
|                   | Sacomatoid  | 2.1       | 0.07      | 82 |
| Asbestos exposure | No          | reference | reference | 83 |
|                   | Yes         | 1.9       | 0.001     | 84 |
|                   |             |           |           | 85 |

86  
87  
88 Bott Univariable Analysis with PRACME

|                   |             | HR        | p-value   | 89 |
|-------------------|-------------|-----------|-----------|----|
| Age               | Age         | 1.0       | 0.04      | 90 |
| Stage             | Stage I     | reference | reference | 92 |
|                   | Stage II    | 1.5       | 0.5       | 93 |
|                   | Stage III   | 3.7       | 0.03      | 94 |
|                   | Stage IV    | 4.8       | 0.01      | 94 |
| Sex               | Female      | reference | reference | 95 |
|                   | Male        | 1.1       | 0.8       | 96 |
| Histology         | Epithelioid | reference | reference | 96 |
|                   | Biphasic    | 1.2       | 0.002     | 97 |
|                   | Sacomatoid  | 1.5       | 0.007     | 98 |
| Asbestos exposure | No          | reference | reference | 99 |
|                   | Yes         | 1.0       | 0.9       | 99 |

100 Supplementary Table 8 Mutation status in MPM data  
101

| <b>Mutation</b> | <b>Mutated Size</b> | <b>T-score</b> | <b>T-test p-value</b> | <b>Wilcox Test p-value</b> | <b>Mutated Mean</b> | <b>WO Mut Mean</b> |
|-----------------|---------------------|----------------|-----------------------|----------------------------|---------------------|--------------------|
| NF2             | 37                  | 2.80           | 0.007                 | 0.002                      | 0.66                | 0.65               |
| BAP1            | 46                  | 0.94           | 0.35                  | 0.35                       | 0.67                | 0.65               |
| SETD2           | 17                  | -1.40          | 0.18                  | 0.18                       | 0.64                | 0.66               |
| TP53            | 16                  | 0.24           | 0.81                  | 0.94                       | 0.66                | 0.65               |

102

103

104

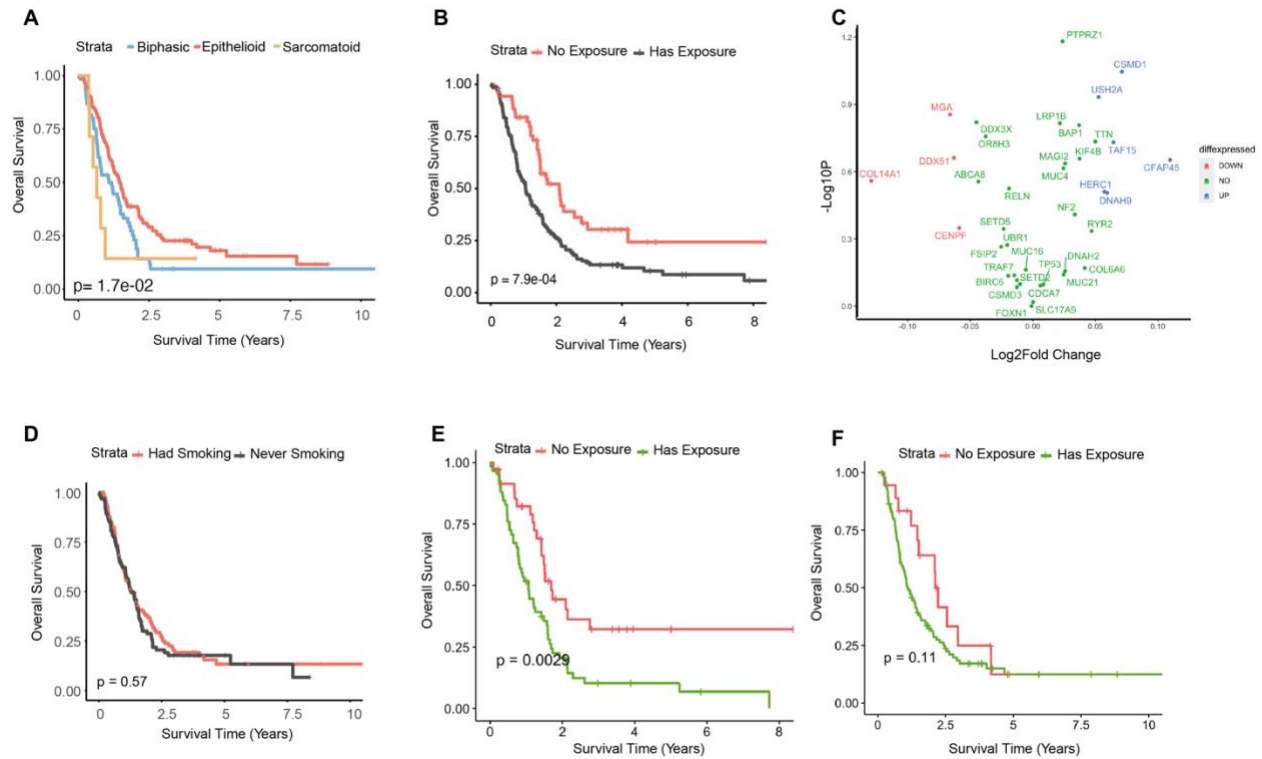

105  
106  
107  
108  
109  
110  
111  
112

Supplementary Figure 1 Association of PRACME signature score with additional clinical features

In Bueno MPM dataset, A) PRACME score for three histology; B) PRACME for asbestos exposure; C) Targeted mutation volcano plot; D) PRACME score for patients smoking history. We separated patients with never smokers and ever smokers; E) PRACME score for asbestos exposure in never-smokers; F) PRACME score for asbestos exposure in ever-smokers.

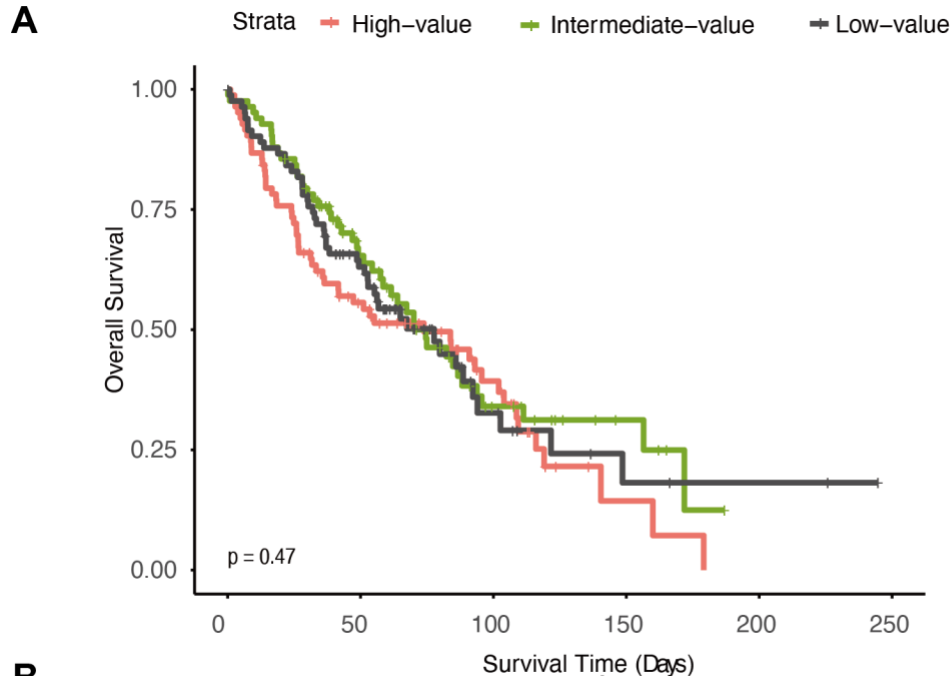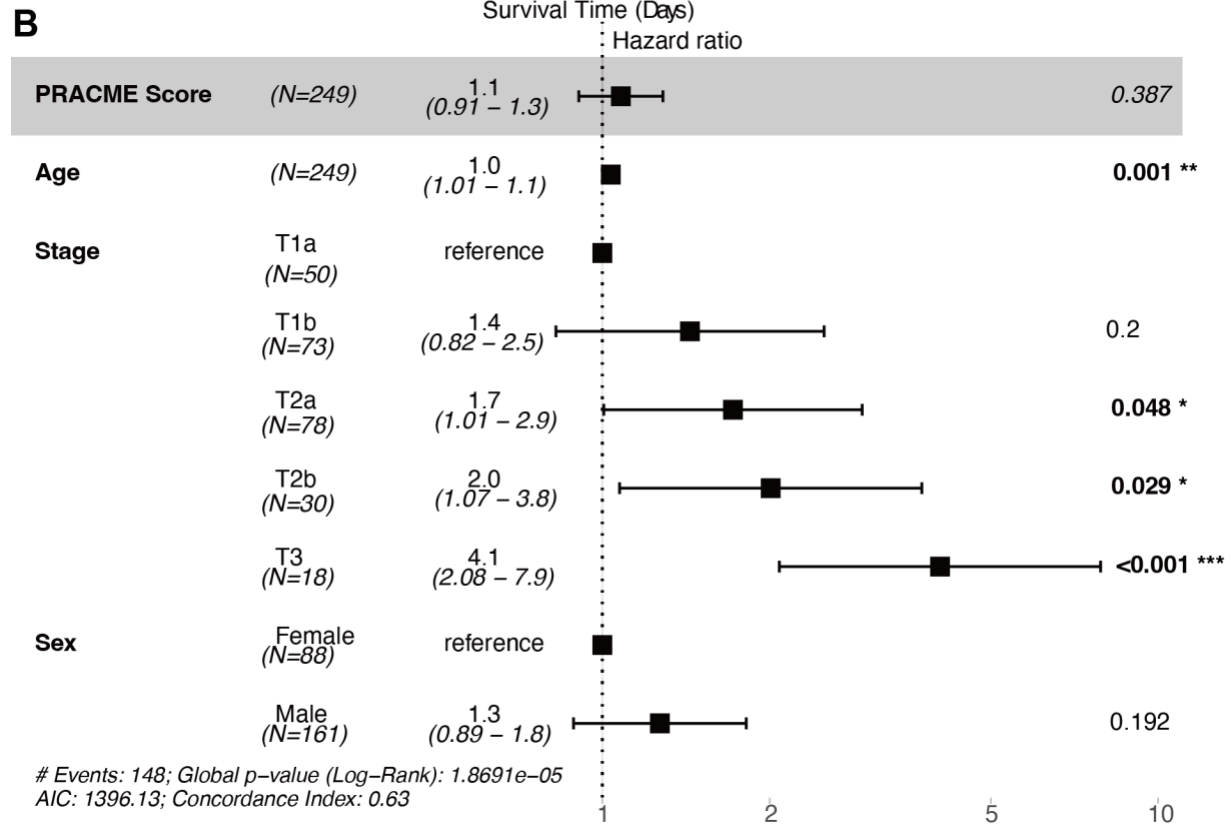

113  
114  
115  
116  
117  
118

Supplementary Figure 2 PRACME signature is not predictive of prognosis in lung squamous carcinoma

In Bueno GSE157011 LUSC patients, A) PRACME score for high-, intermediate-, and low-group patients; B) PRACME score adjusted for age, stage, and sex.

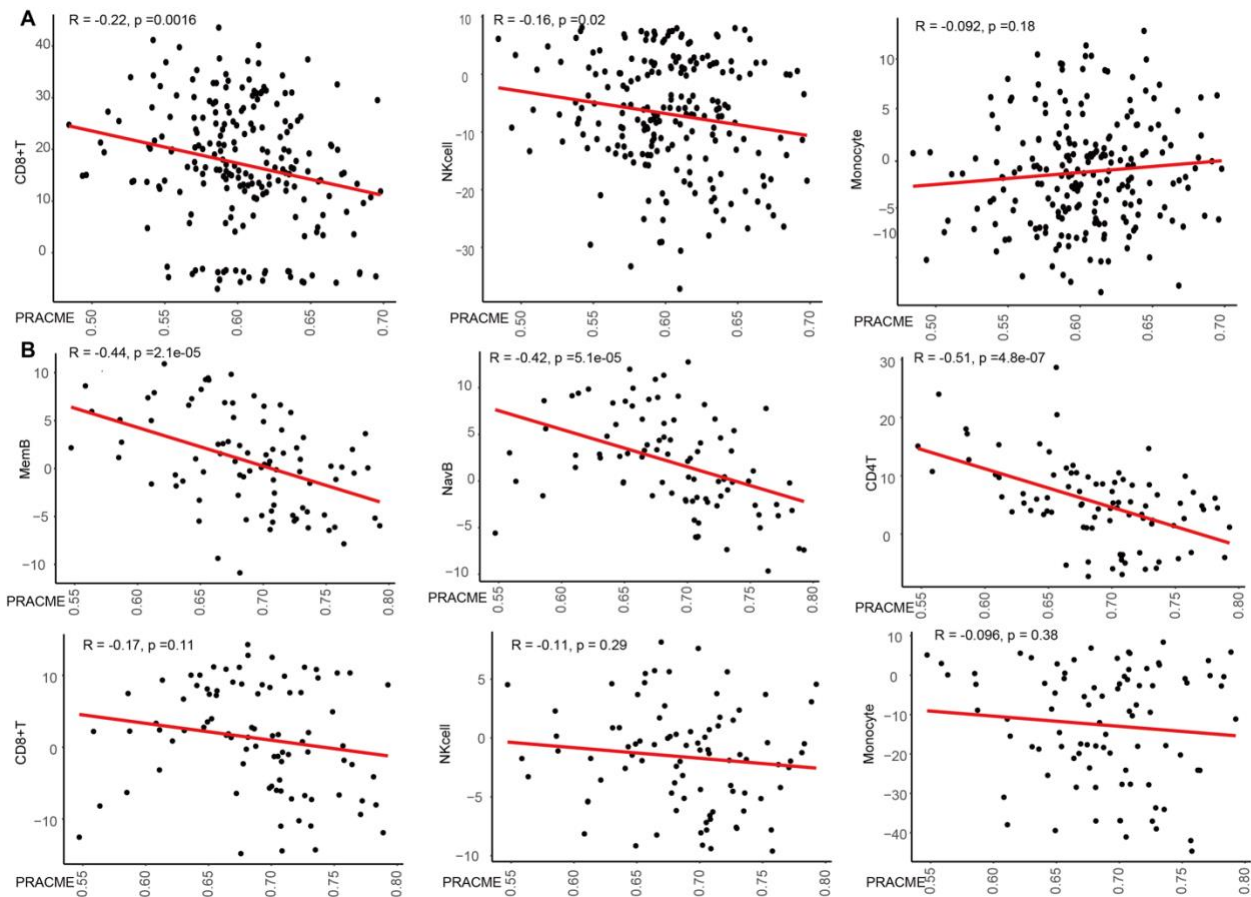

119  
 120  
 121  
 122  
 123  
 124  
 125

Supplementary Figure 3 PRACME signature is negatively correlated to immune infiltration levels In Buco MPM dataset, A) PRACME correlation with CD8+T cells, NK cells and Monocyte infiltration. In TCGA-MESO, B) PRACME correlation with Memory B cells, Naïve B cells, CD4+T cells, CD8+T cells, NK cells and Monocyte infiltration.



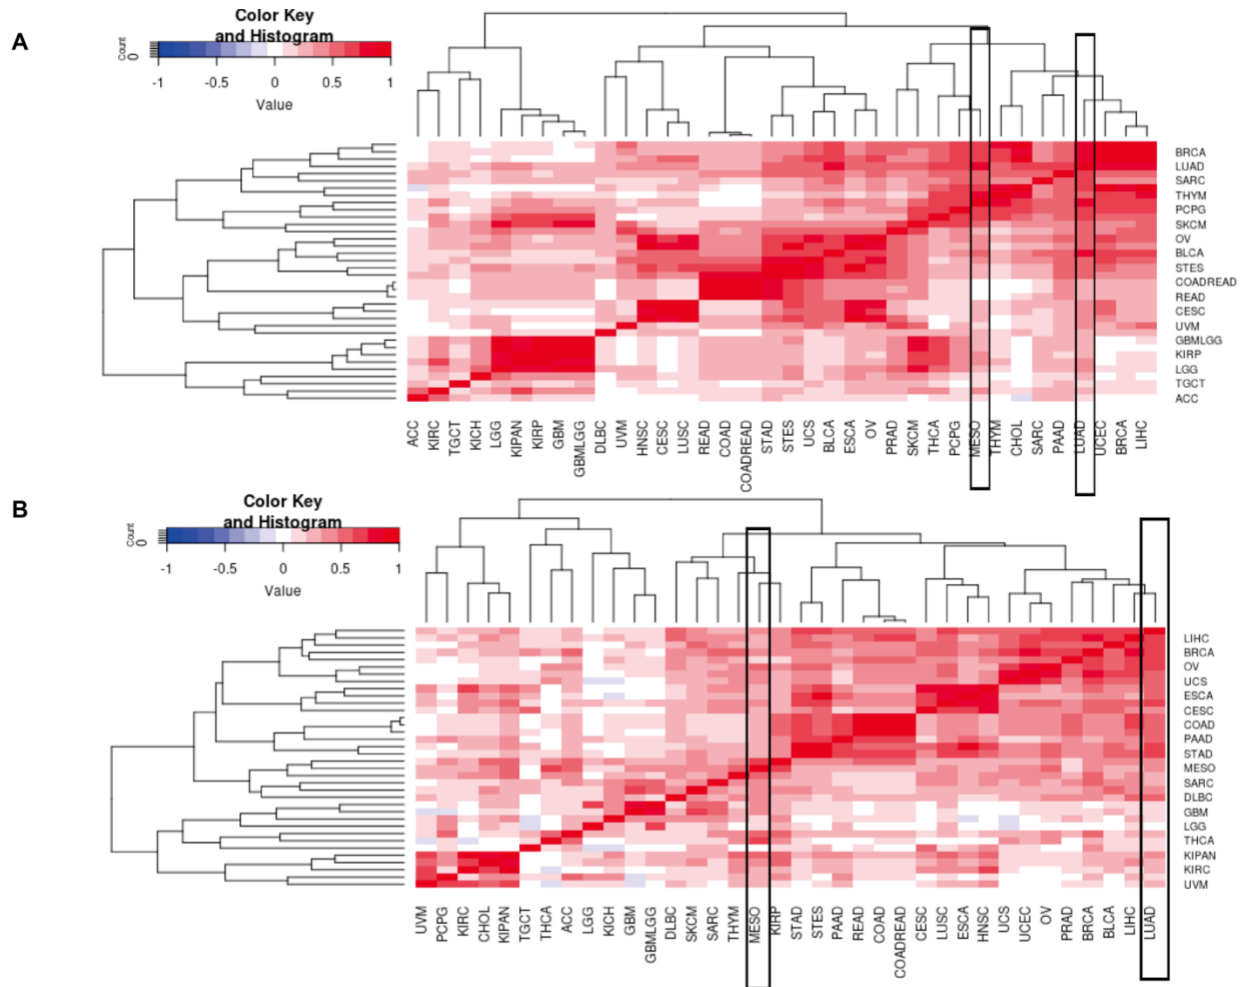

126  
 127  
 128  
 129  
 130

In TCGA-MESO, A) Gene-level amplification frequency correlation between 37 other common cancer types; B) Gene-level deletion frequency correlation between 37 other common cancer types

131 Supplementary Figure 4 Wilcox Test Between signature score and histology in multiregional  
132 data

133

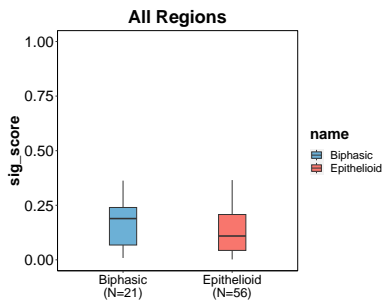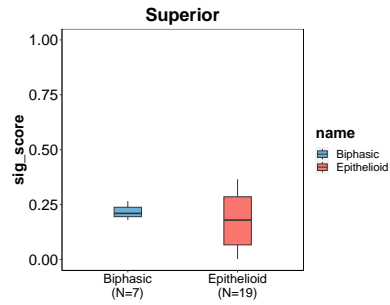

134

135 p-value = 0.22

p-value = 0.9

136

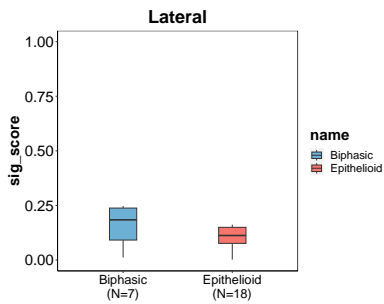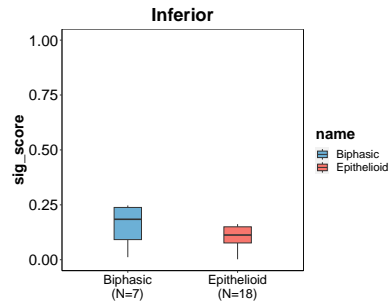

137

138 p-value = 0.7

p-value = 0.06

139
